# Supplementary material for: Rapid assembly of explicit, functional silicones
Source: Royal Society of Chemistry journal article supplement (doi:10.1039/c0dt00400f), 2010-01-01
Supplement: c0dt00400f.pdf [file c0dt00400f.pdf]

## Rapid Assembly of Explicit, Functional Silicones

John B. Grande,<sup>a</sup> Ferdinand Gonzaga,<sup>a</sup> and Michael A. Brook<sup>\*a,b</sup>

Received (in XXX, XXX) Xth XXXXXXXXXX 200X, Accepted Xth XXXXXXXXXX 200X

First published on the web Xth XXXXXXXXXX 200X

DOI: 10.1039/b0000000

### Reaction of pentamethyldisiloxane with (3-glycidoxypentyl)-trimethoxysilane:

NMR of reaction completed in hexane :

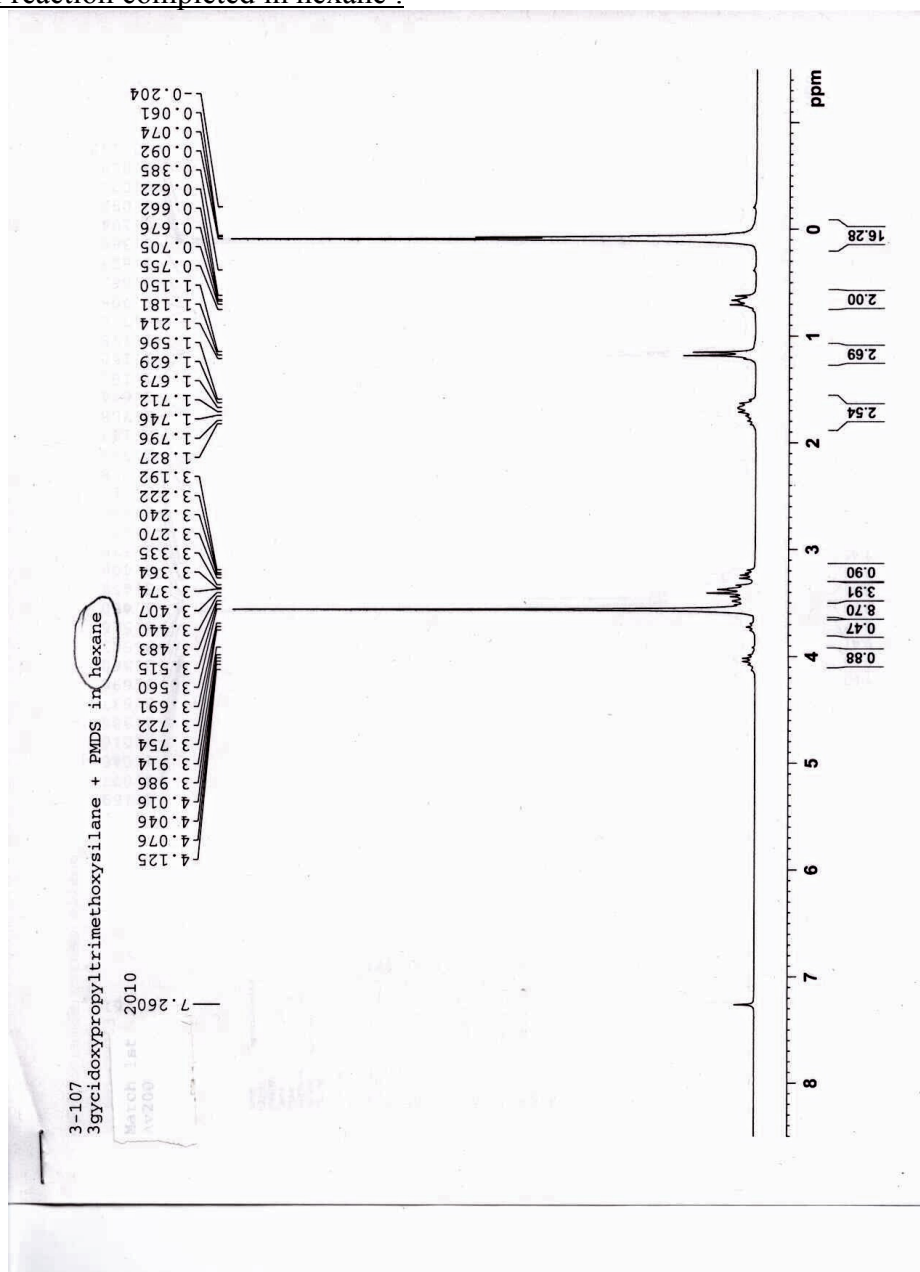

NMR of reaction completed in dichloromethane :

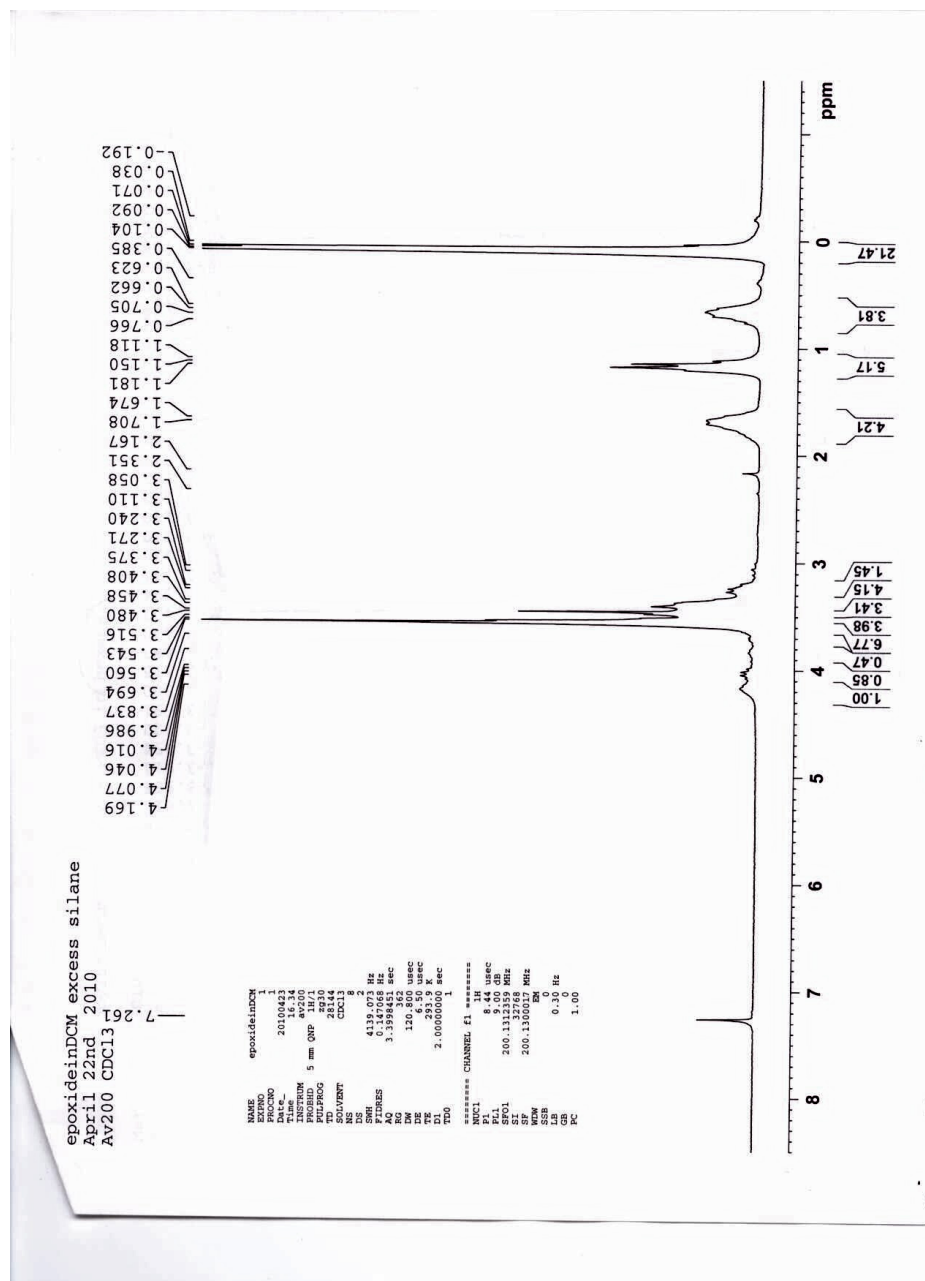

**Reaction of Trimethylsilyl protected (3-hydroxypropyl)trimethoxysilane with pentamethyldisiloxane (excess hydrosilane 6 equiv):**

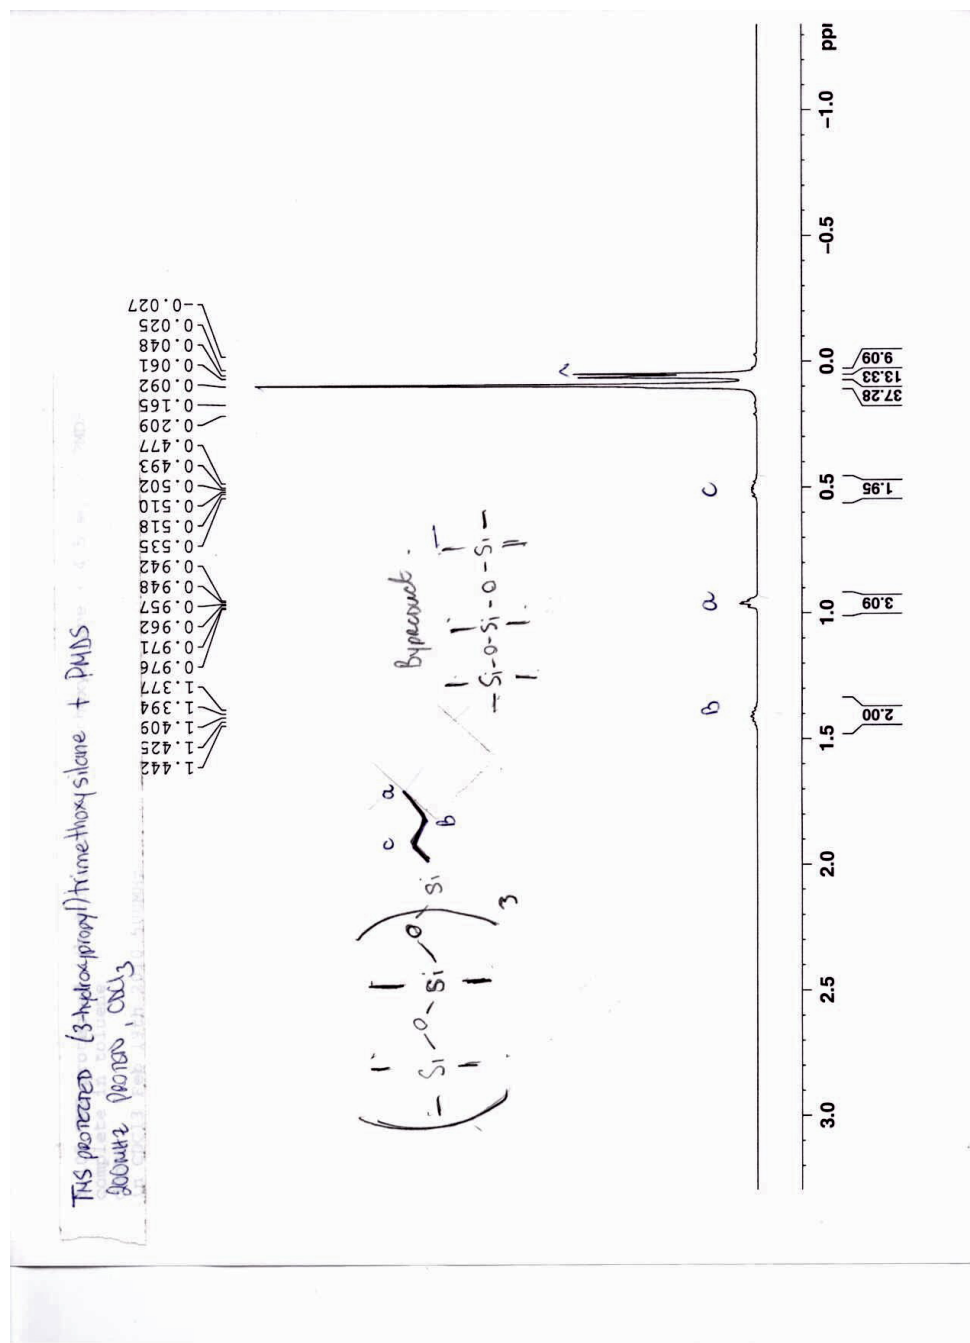

**Reaction of Benzyl protected (3-hydroxypropyl)trimethoxysilane with pentamethyldisiloxane (COSY):**

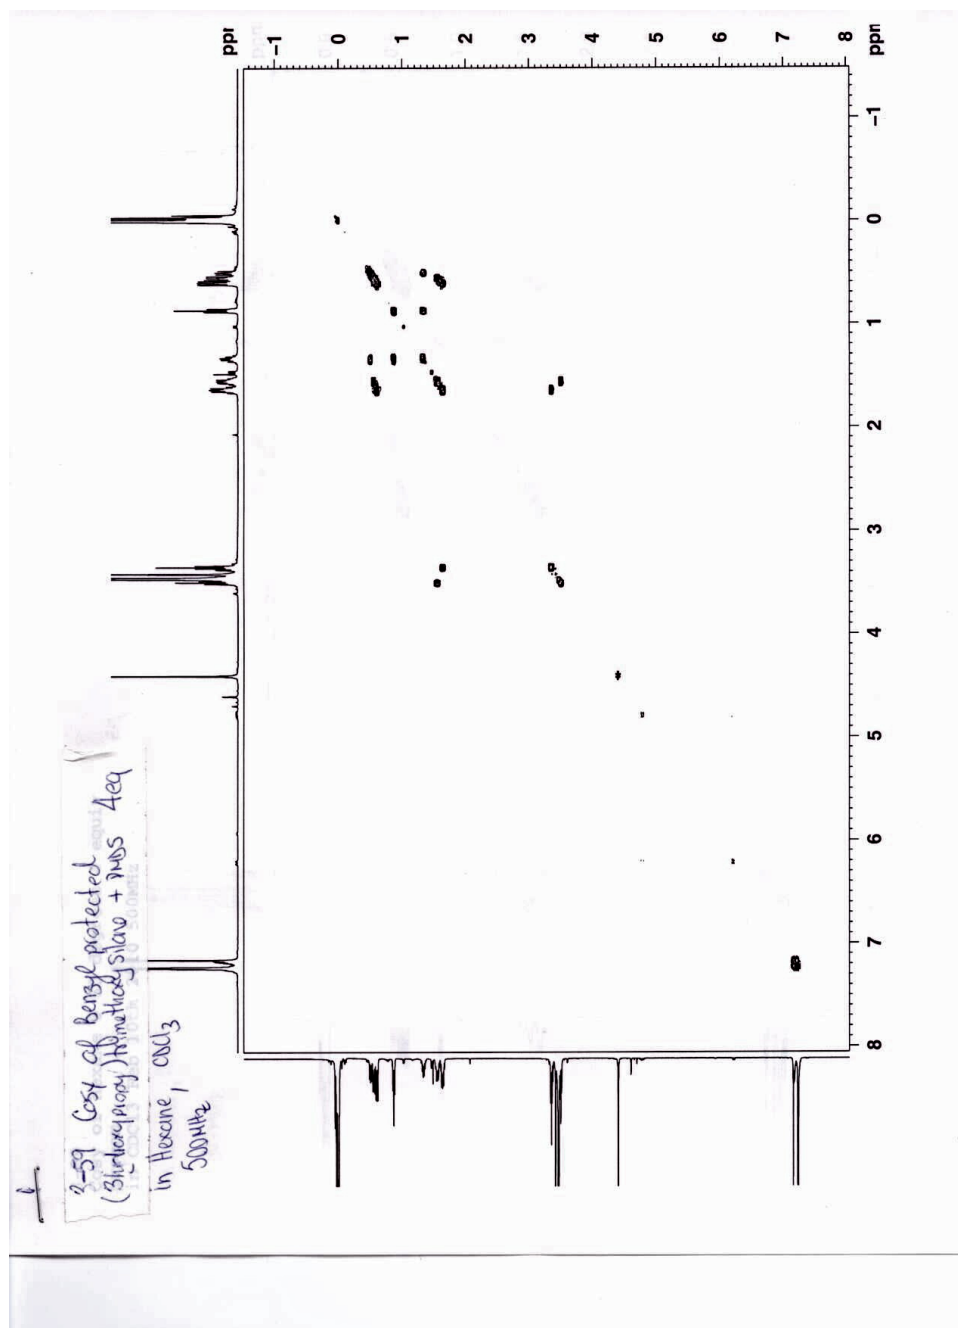

3-59 Cost of benzyl protected  
(3-bromopropyl)trimethylsilane + DMS 4 eq

in hexane,  $\text{CSeCl}_3$   
 $\text{SO}_2\text{Me}_2$
